# Supplementary material
Source: publisher site journal article supplement (https://www.dovepress.com/article/520656)
Supplement: Supplementary file 1 [file 520656%20%252509Supplementary%20Material.docx]

**Table S1.** The ratio of the weight of the LIFP and BIFP (%)

| **Control** | **NIR** | **AuNRs+NIR** | **AuNRs-PPARγmAb+NIR** |
| --- | --- | --- | --- |
| 48.3 | 48.6 | 39.8 | 28.4 |
| 62.3 | 52.4 | 41.4 | 26.7 |
| 51.3 | 53.8 | 43.9 | 35.3 |
| 54.3 | 51.6 | 46.9 | 29.2 |
| 55.6 | 52.2 | 42.4 | 30.2 |

**Table S2.** The ratio of the areas of the LIFP and BIFP (%)

| **Control** | **NIR** | **AuNRs+NIR** | **AuNRs-PPARγmAb+NIR** |
| --- | --- | --- | --- |
| 46.5 | 42.4 | 36.2 | 23.0 |
| 48.4 | 50.3 | 38.3 | 21.7 |
| 49.5 | 43.1 | 42.9 | 18.9 |
| 50.6 | 45.4 | 32.5 | 19.7 |
| 47.8 | 41.2 | 33.4 | 18.3 |
